# Supplementary material for: Divergent Mortality Trends in Hematologic Malignancies and Diffuse Non–Hodgkin Lymphoma Across the United States: A CDC WONDER Database Analysis from 1999 to 2023
Source: Research Square preprint supplement (doi:10.21203/rs.3.rs-8312078/v1), 2026-01-08
Supplement: Supplementary file 1 [file 74d583d91922d4ef34c353b3.docx]

**Supporting Information**

**Table S1. Trends in Deaths and Age-Adjusted Mortality Rates (AAMR) from HLM in the United States, 1999 to 2023**

| **Characteristic** | **Death** | | | **AAMR** | | |
| --- | --- | --- | --- | --- | --- | --- |
| **1999** | **2023** | **Percent.change(%)** | **1999** | **2023** | **AAPC (95% CI)** |
| Alabama | 859 | 897 | 4.42 | 29.63 (27.65 to 31.61) | 21.07 (19.67 to 22.48) | -1.82 (-2.31 to -1.33* |
| Alaska | 59 | 85 | 44.07 | 28.82 (21.18 to 38.33) | 17.94 (14.16 to 22.42) | -1.89 (-2.54 to -1.25* |
| Arizona | 978 | 1179 | 20.55 | 30.13 (28.23 to 32.02) | 17.72 (16.70 to 18.75) | -1.72 (-1.93 to -1.51* |
| Arkansas | 600 | 611 | 1.83 | 32.21 (29.63 to 34.80) | 23.95 (22.02 to 25.88) | -1.71 (-1.99 to -1.43* |
| California | 5441 | 5816 | 6.89 | 29.25 (28.47 to 30.03) | 19.30 (18.80 to 19.80) | -1.70 (-1.79 to -1.61* |
| Colorado | 660 | 808 | 22.42 | 29.78 (27.49 to 32.07) | 18.82 (17.51 to 20.14) | -1.84 (-2.07 to -1.62* |
| Connecticut | 680 | 650 | -4.41 | 28.36 (26.22 to 30.49) | 19.88 (18.33 to 21.44) | -1.75 (-1.95 to -1.55* |
| Delaware | 130 | 208 | 60.00 | 25.86 (21.40 to 30.33) | 22.21 (19.09 to 25.33) | -1.31 (-1.77 to -0.84* |
| District of Columbia | 106 | 66 | -37.74 | 29.57 (23.94 to 35.20) | 15.00 (11.58 to 19.12) | -2.26 (-2.95 to -1.57* |
| Florida | 3832 | 4324 | 12.84 | 29.01 (28.08 to 29.93) | 18.70 (18.13 to 19.27) | -1.67 (-1.77 to -1.58* |
| Georgia | 1203 | 1582 | 31.50 | 28.75 (27.12 to 30.39) | 20.02 (19.02 to 21.03) | -1.62 (-1.80 to -1.44* |
| Hawaii | 198 | 223 | 12.63 | 25.09 (21.59 to 28.59) | 15.73 (13.62 to 17.85) | -1.34 (-1.70 to -0.99* |
| Idaho | 232 | 323 | 39.22 | 31.02 (27.03 to 35.02) | 20.91 (18.60 to 23.23) | -1.54 (-1.93 to -1.15* |
| Illinois | 2547 | 2138 | -16.06 | 33.09 (31.80 to 34.37) | 20.64 (19.76 to 21.52) | -1.97 (-2.10 to -1.84* |
| Indiana | 1284 | 1220 | -4.98 | 33.47 (31.64 to 35.30) | 22.53 (21.24 to 23.81) | -1.65 (-1.81 to -1.50* |
| Iowa | 690 | 666 | -3.48 | 31.64 (29.26 to 34.01) | 23.64 (21.82 to 25.46) | -1.53 (-1.76 to -1.31* |
| Kansas | 563 | 578 | 2.66 | 31.39 (28.79 to 33.99) | 24.28 (22.27 to 26.28) | -1.45 (-1.71 to -1.20* |
| Kentucky | 803 | 858 | 6.85 | 31.31 (29.14 to 33.47) | 23.53 (21.92 to 25.13) | -1.17 (-1.36 to -0.98* |
| Louisiana | 858 | 778 | -9.32 | 32.64 (30.45 to 34.83) | 21.25 (19.73 to 22.77) | -1.73 (-1.91 to -1.54* |
| Maine | 270 | 323 | 19.63 | 29.47 (25.95 to 32.99) | 22.24 (19.75 to 24.72) | -1.49 (-1.85 to -1.13* |
| Maryland | 989 | 1085 | 9.71 | 31.73 (29.74 to 33.71) | 21.58 (20.28 to 22.88) | -1.65 (-1.85 to -1.44* |
| Massachusetts | 1386 | 1168 | -15.73 | 31.79 (30.12 to 33.47) | 19.23 (18.12 to 20.35) | -2.01 (-2.19 to -1.83* |
| Michigan | 2040 | 1935 | -5.15 | 32.81 (31.39 to 34.23) | 22.12 (21.12 to 23.12) | -1.60 (-1.77 to -1.44* |
| Minnesota | 1069 | 1075 | 0.56 | 34.57 (32.50 to 36.65) | 22.37 (21.02 to 23.73) | -1.80 (-2.66 to -0.93* |
| Mississippi | 515 | 564 | 9.51 | 29.68 (27.11 to 32.24) | 23.44 (21.47 to 25.41) | -1.13 (-1.41 to -0.85* |
| Missouri | 1232 | 1084 | -12.01 | 32.45 (30.63 to 34.26) | 20.83 (19.57 to 22.09) | -1.75 (-1.91 to -1.60* |
| Montana | 205 | 238 | 16.10 | 33.36 (28.79 to 37.93) | 23.43 (20.39 to 26.47) | -1.99 (-2.38 to -1.60* |
| Nebraska | 406 | 374 | -7.88 | 34.60 (31.22 to 37.98) | 23.84 (21.39 to 26.29) | -1.65 (-1.91 to -1.39* |
| Nevada | 274 | 454 | 65.69 | 24.73 (21.74 to 27.72) | 17.98 (16.29 to 19.66) | -1.63 (-2.03 to -1.23* |
| New Hampshire | 220 | 236 | 7.27 | 28.81 (25.00 to 32.62) | 18.08 (15.73 to 20.44) | -1.93 (-2.40 to -1.45* |
| New Jersey | 1814 | 1362 | -24.92 | 32.21 (30.73 to 33.70) | 17.25 (16.32 to 18.18) | -2.56 (-3.20 to -1.92* |
| New Mexico | 281 | 327 | 16.37 | 26.26 (23.18 to 29.34) | 17.72 (15.76 to 19.68) | -1.80 (-2.18 to -1.42* |
| New York | 3676 | 2944 | -19.91 | 29.66 (28.70 to 30.62) | 17.08 (16.45 to 17.70) | -2.38 (-2.62 to -2.14* |
| North Carolina | 1528 | 1760 | 15.18 | 31.18 (29.61 to 32.75) | 20.10 (19.15 to 21.06) | -1.70 (-1.87 to -1.53* |
| North Dakota | 162 | 134 | -17.28 | 34.11 (28.81 to 39.40) | 21.60 (17.86 to 25.33) | -1.81 (-2.36 to -1.26* |
| Ohio | 2544 | 2207 | -13.25 | 33.57 (32.26 to 34.87) | 21.72 (20.80 to 22.64) | -1.65 (-1.80 to -1.49* |
| Oklahoma | 680 | 790 | 16.18 | 29.75 (27.51 to 31.98) | 25.04 (23.28 to 26.81) | -1.05 (-1.32 to -0.78* |
| Oregon | 721 | 798 | 10.68 | 31.88 (29.55 to 34.20) | 21.16 (19.67 to 22.65) | -1.68 (-1.91 to -1.45* |
| Pennsylvania | 3113 | 2570 | -17.44 | 33.02 (31.85 to 34.18) | 21.19 (20.36 to 22.02) | -1.72 (-1.83 to -1.61* |
| Rhode Island | 213 | 184 | -13.62 | 28.01 (24.22 to 31.79) | 17.88 (15.27 to 20.49) | -1.70 (-2.00 to -1.40* |
| South Carolina | 687 | 985 | 43.38 | 28.15 (26.04 to 30.27) | 21.24 (19.88 to 22.60) | -1.48 (-1.76 to -1.20* |
| South Dakota | 183 | 178 | -2.73 | 34.39 (29.36 to 39.41) | 23.84 (20.27 to 27.41) | -1.75 (-2.23 to -1.26* |
| Tennessee | 1206 | 1290 | 6.97 | 33.64 (31.74 to 35.54) | 22.66 (21.41 to 23.92) | -1.71 (-1.86 to -1.57* |
| Texas | 3207 | 4048 | 26.22 | 29.85 (28.81 to 30.89) | 20.43 (19.80 to 21.07) | -1.75 (-1.90 to -1.59* |
| Utah | 305 | 356 | 16.72 | 30.91 (27.43 to 34.40) | 18.92 (16.93 to 20.92) | -1.70 (-2.12 to -1.27* |
| Vermont | 140 | 134 | -4.29 | 35.24 (29.40 to 41.08) | 20.32 (16.82 to 23.82) | -1.92 (-2.36 to -1.48* |
| Virginia | 1359 | 1491 | 9.71 | 33.11 (31.34 to 34.88) | 21.22 (20.13 to 22.32) | -1.70 (-1.92 to -1.48* |
| Washington | 1193 | 1269 | 6.37 | 34.34 (32.39 to 36.29) | 20.70 (19.54 to 21.85) | -1.93 (-2.14 to -1.72* |
| West Virginia | 446 | 384 | -13.90 | 32.67 (29.63 to 35.71) | 22.07 (19.81 to 24.33) | -1.25 (-1.51 to -0.99* |
| Wisconsin | 1224 | 1188 | -2.94 | 34.31 (32.39 to 36.24) | 23.13 (21.79 to 24.47) | -1.70 (-2.51 to -0.89* |
| Wyoming | 69 | 94 | 36.23 | 23.18 (18.04 to 29.34) | 18.87 (15.19 to 23.17) | -1.52 (-2.22 to -0.82* |

**Abbreviations:** AAMR, Age-Adjusted Mortality Rate (per 100,000 population); AAPC, Average Annual Percent Change; CI, Confidence Interval.

**Notes:** * is statistically significant (95% CI does not include 0).

**Table S2. Trends in Deaths and Age-Adjusted Mortality Rates (AAMR) from DNHL in the United States, 1999 to 2023**

| **Characteristic** | **Death** | | | **AAMR** | | |
| --- | --- | --- | --- | --- | --- | --- |
| **1999** | **2023** | **Percent.change(%)** | **1999** | **2023** | **AAPC (95% CI)** |
| Alabama | 24 | 91 | 279.17 | 0.85 (0.54 to 1.26) | 2.14 (1.71 to 2.64) |  |
| Alaska |  | 16 | NA | NA (NA to NA) | NA (2.02 to 5.95) |  |
| Arizona | 44 | 150 | 240.91 | 1.38 (1.00 to 1.85) | 2.22 (1.86 to 2.58) | 2.16 (-0.37 to 4.74 |
| Arkansas | 12 | 66 | 450.00 | NA (0.36 to 1.21) | 2.55 (1.96 to 3.26) |  |
| California | 200 | 829 | 314.50 | 1.07 (0.92 to 1.22) | 2.76 (2.57 to 2.95) | 4.05 (1.94 to 6.19* |
| Colorado | 31 | 121 | 290.32 | 1.39 (0.94 to 1.99) | 2.83 (2.32 to 3.34) |  |
| Connecticut | 32 | 89 | 178.12 | 1.35 (0.92 to 1.90) | 2.71 (2.17 to 3.35) |  |
| Delaware | 13 | 25 | 92.31 | NA (1.41 to 4.52) | 2.78 (1.76 to 4.17) |  |
| District of Columbia |  |  | NA | NA (NA to NA) | NA (NA to NA) |  |
| Florida | 227 | 487 | 114.54 | 1.73 (1.50 to 1.96) | 2.14 (1.94 to 2.33) | 1.18 (-0.07 to 2.44 |
| Georgia | 44 | 151 | 243.18 | 1.06 (0.76 to 1.42) | 1.89 (1.59 to 2.20) | 2.63 (0.41 to 4.89* |
| Hawaii | 13 | 31 | 138.46 | NA (0.87 to 2.80) | 2.21 (1.48 to 3.17) |  |
| Idaho | 13 | 46 | 253.85 | NA (0.93 to 3.00) | 3.03 (2.21 to 4.06) |  |
| Illinois | 107 | 270 | 152.34 | 1.39 (1.13 to 1.65) | 2.58 (2.26 to 2.89) | 2.71 (1.56 to 3.87* |
| Indiana | 48 | 176 | 266.67 | 1.23 (0.91 to 1.63) | 3.20 (2.72 to 3.68) | 4.03 (1.37 to 6.77* |
| Iowa | 76 | 95 | 25.00 | 3.60 (2.83 to 4.52) | 3.37 (2.72 to 4.13) | -0.25 (-2.90 to 2.48 |
| Kansas | 18 | 79 | 338.89 | NA (0.59 to 1.57) | 3.24 (2.55 to 4.06) |  |
| Kentucky | 33 | 118 | 257.58 | 1.29 (0.89 to 1.82) | 3.21 (2.62 to 3.80) | 4.44 (2.44 to 6.48* |
| Louisiana | 45 | 68 | 51.11 | 1.71 (1.25 to 2.29) | 1.87 (1.45 to 2.38) | 1.73 (-0.55 to 4.05 |
| Maine | 20 | 44 | 120.00 | 2.23 (1.36 to 3.45) | 2.98 (2.15 to 4.03) |  |
| Maryland | 56 | 141 | 151.79 | 1.75 (1.32 to 2.28) | 2.82 (2.35 to 3.29) | 1.79 (0.05 to 3.57* |
| Massachusetts | 52 | 129 | 148.08 | 1.20 (0.90 to 1.58) | 2.15 (1.78 to 2.53) | 4.28 (3.21 to 5.35* |
| Michigan | 95 | 238 | 150.53 | 1.52 (1.23 to 1.86) | 2.72 (2.37 to 3.07) | 3.19 (-0.67 to 7.20 |
| Minnesota | 67 | 173 | 158.21 | 2.16 (1.68 to 2.75) | 3.57 (3.03 to 4.11) | 1.42 (-0.79 to 3.67 |
| Mississippi | 21 | 54 | 157.14 | 1.21 (0.75 to 1.84) | 2.12 (1.59 to 2.78) |  |
| Missouri | 80 | 165 | 106.25 | 2.11 (1.67 to 2.63) | 3.13 (2.64 to 3.61) | 2.01 (0.23 to 3.81* |
| Montana | 12 | 28 | 133.33 | NA (1.01 to 3.41) | 2.73 (1.80 to 3.98) |  |
| Nebraska | 22 | 45 | 104.55 | 1.82 (1.14 to 2.76) | 2.99 (2.17 to 4.01) |  |
| Nevada |  | 40 | NA | NA (NA to NA) | 1.51 (1.08 to 2.07) |  |
| New Hampshire | 14 | 36 | 157.14 | NA (1.00 to 3.06) | 2.76 (1.91 to 3.86) |  |
| New Jersey | 49 | 161 | 228.57 | 0.85 (0.63 to 1.13) | 2.04 (1.72 to 2.36) | 3.41 (1.07 to 5.80* |
| New Mexico | 12 | 29 | 141.67 | NA (0.58 to 1.98) | 1.67 (1.10 to 2.43) |  |
| New York | 160 | 424 | 165.00 | 1.31 (1.10 to 1.51) | 2.46 (2.23 to 2.70) | 2.76 (-0.45 to 6.08 |
| North Carolina | 79 | 312 | 294.94 | 1.61 (1.27 to 2.01) | 3.51 (3.11 to 3.90) | 3.06 (1.05 to 5.11* |
| North Dakota |  | 22 | NA | NA (NA to NA) | 3.33 (2.06 to 5.08) |  |
| Ohio | 100 | 269 | 169.00 | 1.32 (1.06 to 1.58) | 2.66 (2.34 to 2.99) | 3.10 (0.48 to 5.78* |
| Oklahoma | 47 | 115 | 144.68 | 2.08 (1.53 to 2.76) | 3.56 (2.90 to 4.22) | 2.89 (0.49 to 5.34* |
| Oregon | 48 | 123 | 156.25 | 2.13 (1.57 to 2.82) | 3.31 (2.71 to 3.91) | 1.95 (-0.59 to 4.55 |
| Pennsylvania | 113 | 308 | 172.57 | 1.19 (0.97 to 1.41) | 2.62 (2.32 to 2.92) | 3.99 (2.62 to 5.37* |
| Rhode Island |  | 16 | NA | NA (NA to NA) | NA (0.90 to 2.56) |  |
| South Carolina | 34 | 114 | 235.29 | 1.36 (0.94 to 1.90) | 2.42 (1.96 to 2.87) | 3.85 (2.73 to 4.98* |
| South Dakota |  | 27 | NA | NA (NA to NA) | 3.70 (2.42 to 5.42) |  |
| Tennessee | 41 | 151 | 268.29 | 1.13 (0.81 to 1.53) | 2.65 (2.22 to 3.09) | 3.85 (0.39 to 7.43* |
| Texas | 179 | 512 | 186.03 | 1.66 (1.42 to 1.90) | 2.59 (2.36 to 2.82) | 1.96 (0.62 to 3.32* |
| Utah | 21 | 49 | 133.33 | 2.18 (1.35 to 3.33) | 2.65 (1.95 to 3.51) |  |
| Vermont | 12 | 20 | 66.67 | NA (1.54 to 5.21) | 2.99 (1.80 to 4.66) |  |
| Virginia | 56 | 178 | 217.86 | 1.38 (1.04 to 1.79) | 2.55 (2.17 to 2.94) | 2.72 (0.76 to 4.73* |
| Washington | 115 | 220 | 91.30 | 3.28 (2.68 to 3.88) | 3.58 (3.10 to 4.05) | 0.59 (-1.27 to 2.48 |
| West Virginia | 21 | 47 | 123.81 | 1.53 (0.94 to 2.33) | 2.83 (2.06 to 3.78) |  |
| Wisconsin | 86 | 181 | 110.47 | 2.42 (1.94 to 2.99) | 3.49 (2.97 to 4.02) | 1.78 (-2.26 to 5.98 |
| Wyoming |  |  | NA | NA (NA to NA) | NA (NA to NA) |  |

**Abbreviations:** AAMR, Age-Adjusted Mortality Rate (per 100,000 population); AAPC, Average Annual Percent Change; CI, Confidence Interval.

**Notes: Blank spaces indicate missing data,** NA is statistically significant, * is statistically significant (95% CI does not include 0).

HLM

Figure S1: APC of HLM Mortality in Selected US States.

**Abbreviations:** APC, Annual Percent Change.

**Notes:** * is statistically significant (95% CI does not include 0).

DNHL


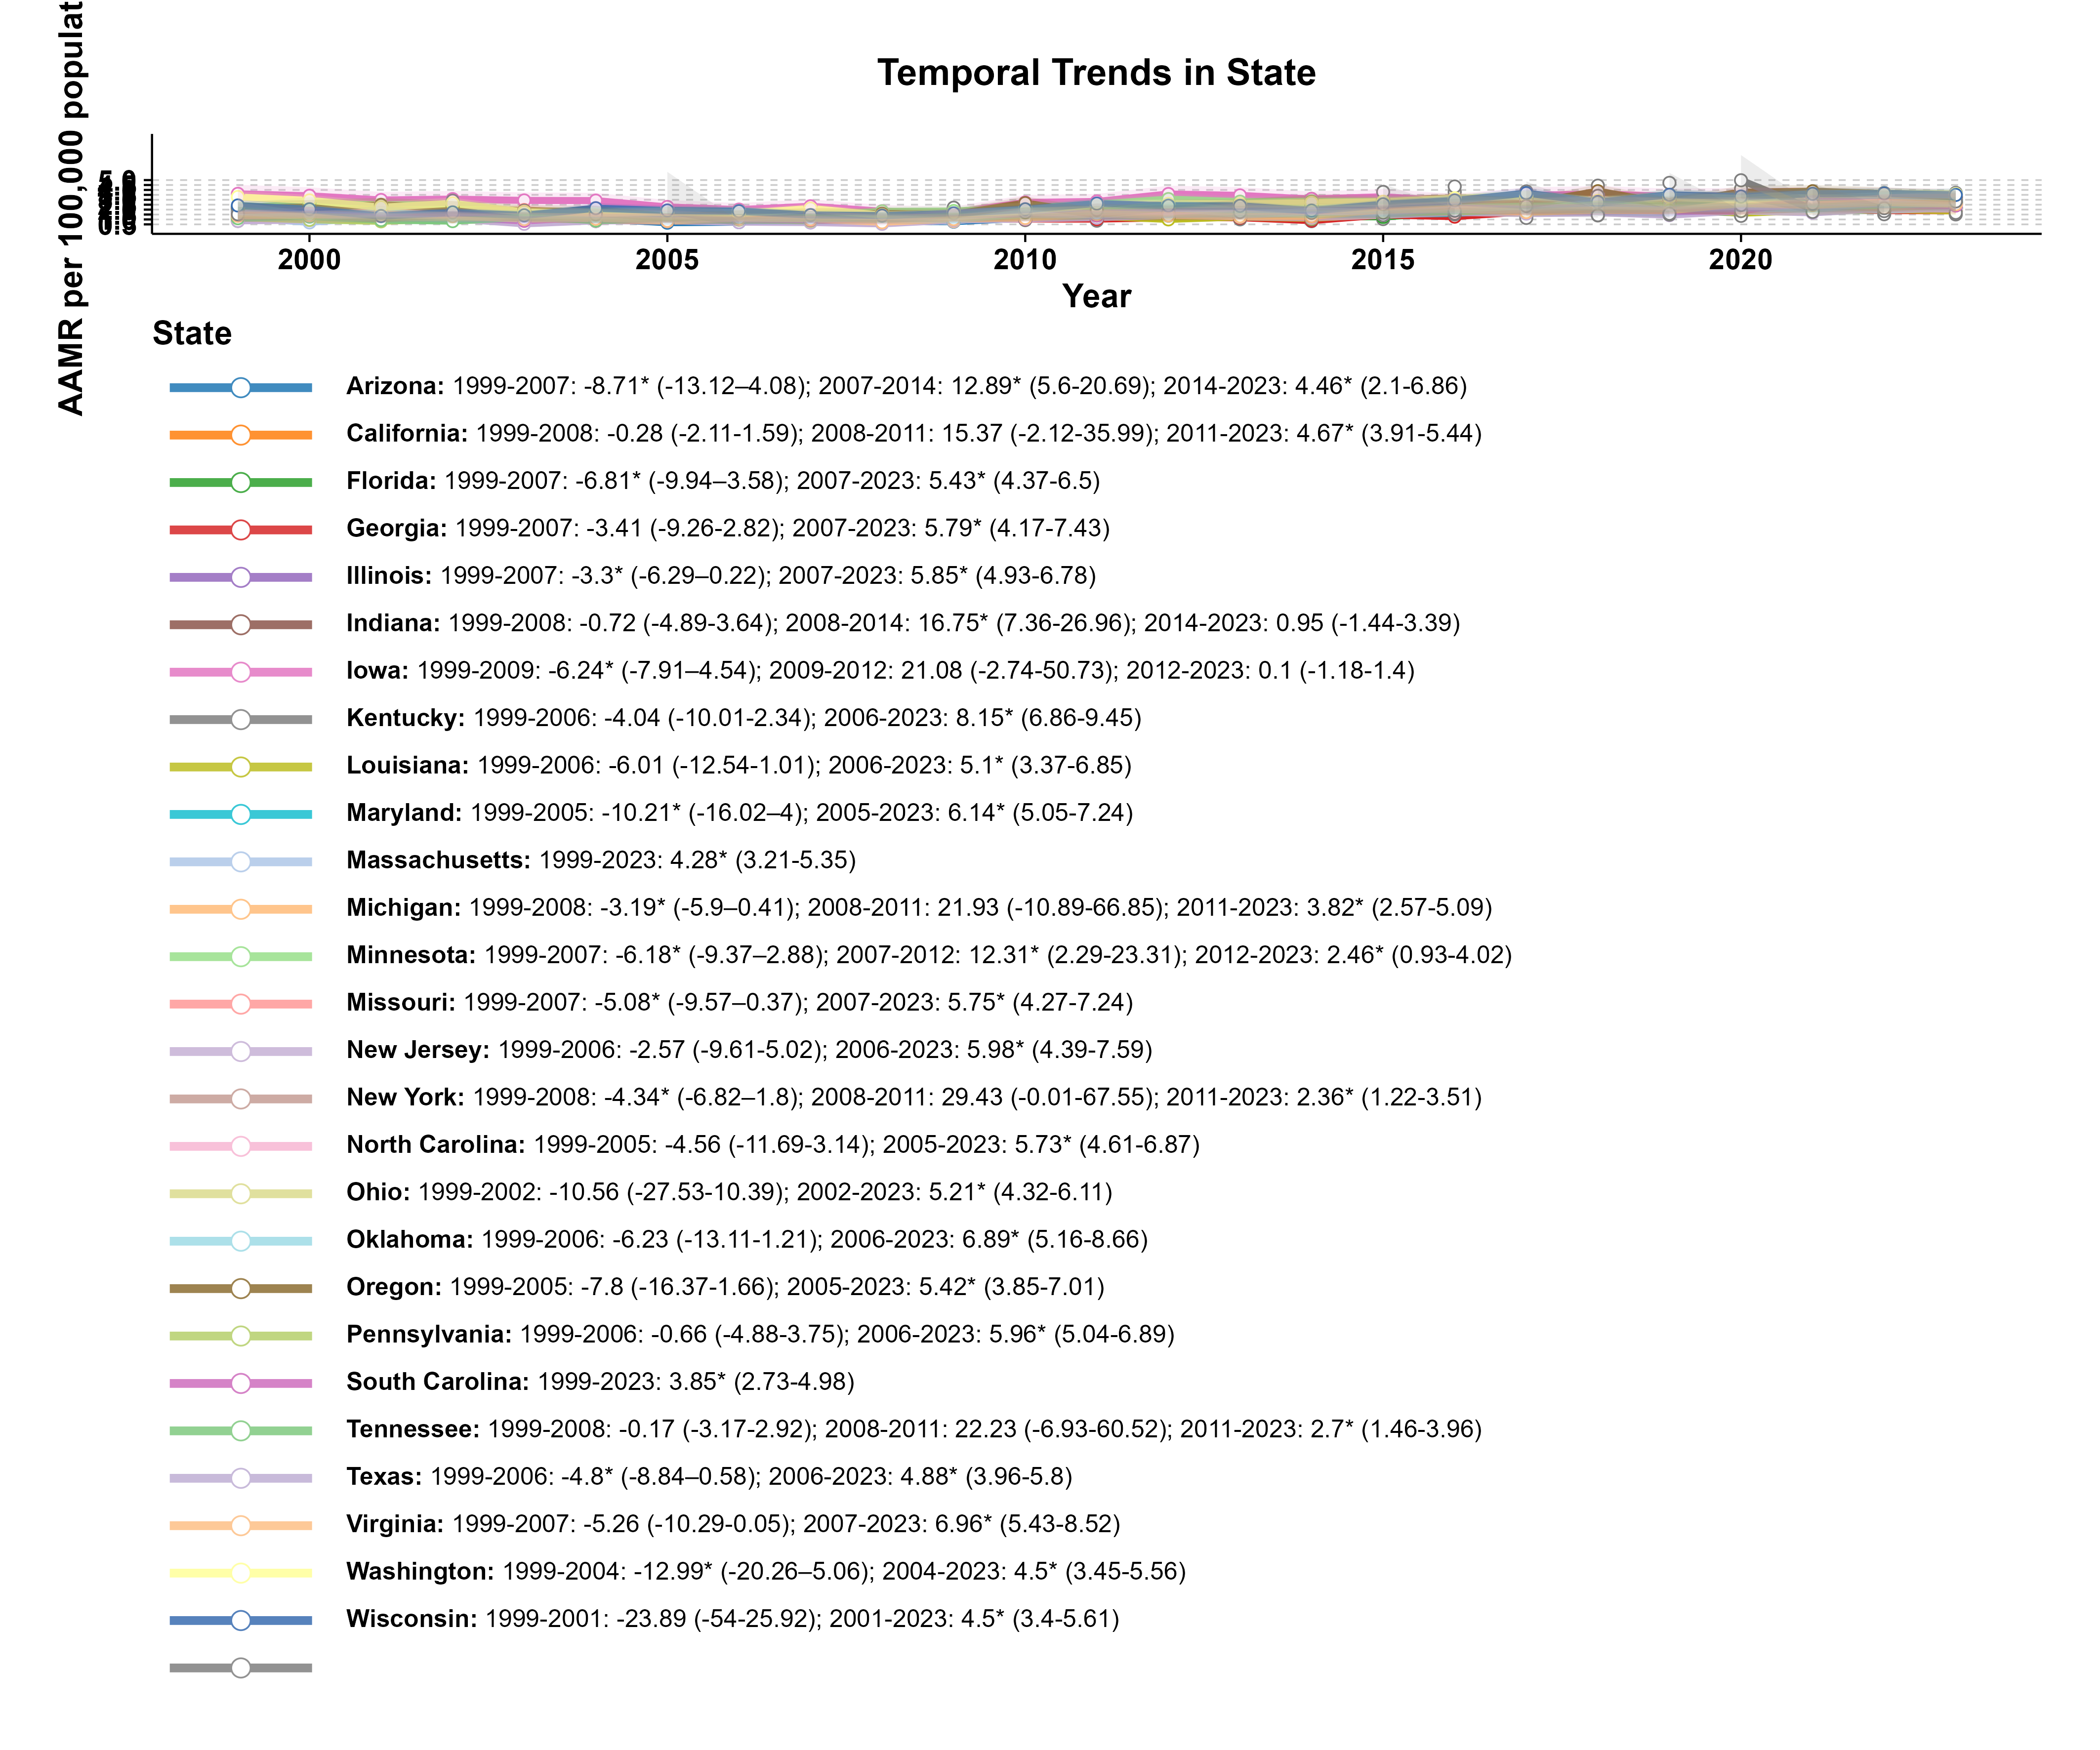


Figure S2: APC of DNHL Mortality in Selected US States.

**Abbreviations:** APC, Annual Percent Change.

**Notes:** * is statistically significant (95% CI does not include 0).
